# Supplementary material for: Controlling glycemic variability in people living with type 1 diabetes receiving insulin glargine 300 U/mL (Gla-300)
Source: HighWire-hosted journal article supplement (doi:10.1136/bmjdrc-2022-002898), 2022-08-01
Supplement: bmjdrc-2022-002898supp001_data_supplement.pdf [file bmjdrc-2022-002898supp001_data_supplement.pdf]

**SUPPLEMENT****FIGURES****Figure S1:** Guidance on targets for assessment of glycemic control for adults with type 1 or type 2 diabetes (modified from Battelino et al. [1])

| Diabetes group | TIR                            |                                   | TBR                             |                                                          | TAR                                   |                                                              |
|----------------|--------------------------------|-----------------------------------|---------------------------------|----------------------------------------------------------|---------------------------------------|--------------------------------------------------------------|
|                | % of readings;<br>time per day | Target range                      | % of readings;<br>time per day  | Below target level                                       | % of readings;<br>time per day        | Above target level                                           |
| Type 1*/type 2 | >70%;<br>>16 h, 48 min         | 70–180 mg/dL<br>(3.9–10.0 mmol/L) | <4%;<br><1 h<br><1%;<br><15 min | <70 mg/dL<br>(<3.9 mmol/L)<br><54 mg/dL<br>(<3.0 mmol/L) | <25%;<br><6 h<br><5%;<br><1 h, 12 min | >180 mg/dL<br>(>10.0 mmol/L)<br>>250 mg/dL<br>(>13.9 mmol/L) |

Each incremental 5% increase in TIR is associated with clinically significant benefits for individuals with type 1 or type 2 diabetes. \*For age <25 years, if the A1C goal is 7.5%, set TIR target to approximately 60%.

**TABLES****Table S1:** Differences between randomised controlled trials (RCTs) and real-world evidence (RWE)

|                     | RCTs                                                        | RWE                                                               |
|---------------------|-------------------------------------------------------------|-------------------------------------------------------------------|
| Purpose             | Efficacy assessment for drug authorization purposes         | Effectiveness assessment in actual clinical practice              |
| Research Question   | Does the drug work in experimental setting                  | In the real-world setting, how is the drug used? Is it effective? |
| Follow-up           | Designed                                                    | In actual practice                                                |
| Treatment           | Fixed pattern                                               | Variable pattern                                                  |
| Study group         | Homogenous / selected                                       | Heterogeneous / real world                                        |
| Attending physician | Investigator                                                | Many practitioners (e.g. endocrinologists, general physicians)    |
| Comparator          | Placebo / selected alternative interventions                | Many alternative interventions                                    |
| Patient monitoring  | Continuous – as per protocol, conducted by the investigator | Changeable – conducted by many doctors                            |

*Legend:* adapted from Wierzbicka & Jahnz-Różyk [2]

**REFERENCES**

1. Battelino T, Danne T, Bergenstal RM et al: Clinical Targets for Continuous Glucose Monitoring Data Interpretation: Recommendations From the International Consensus on Time in Range. *Diabetes Care* 2019, 42(8):1593-1603.
2. Wierzbicka N, Jahnz-Rozyk K: The evolving landscape for Real World Evidence in Poland: physicians' perspective. *JHPOR* 2015, 1:15-33.
